# Supplementary material for: Phase transition, morphology transformation and highly enhanced luminescence properties of YOF:Eu3+ crystals by Gd3+ doping
Source: Royal Society of Chemistry journal article supplement (doi:10.1039/c5nj01119a), 2015-01-01
Supplement: c5nj01119a1.pdf [file c5nj01119a1.pdf]

## **Phase transition, morphological transformation and highly enhanced luminescence properties of YOF:Eu<sup>3+</sup> crystals by Gd<sup>3+</sup> doping**

Ruiqing Li,<sup>a</sup> Nannan Zhang,<sup>a</sup> Linlin Li,<sup>a</sup> Yimai Liang,<sup>a</sup> Yali Liu,<sup>a</sup> and Shucui Gan<sup>\*a</sup>

<sup>a</sup> College of Chemistry, Jilin University, Changchun 130026, PR China

\*Corresponding author: E-mail: gansc@jlu.edu.cn

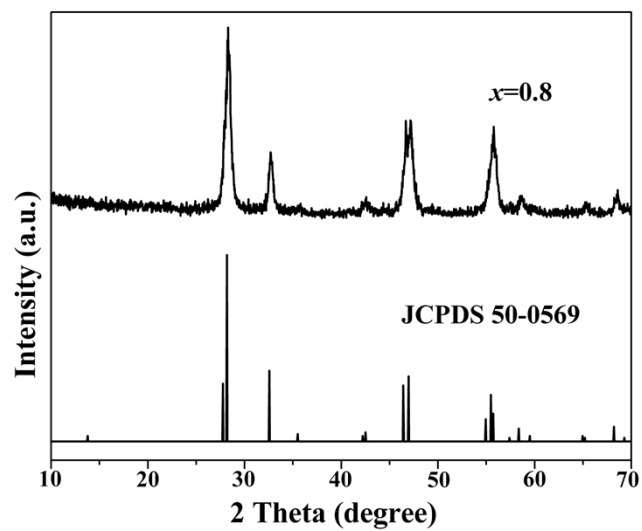

Fig. S1 XRD pattern of  $Y_{0.2}Gd_{0.8}OF$  sample.

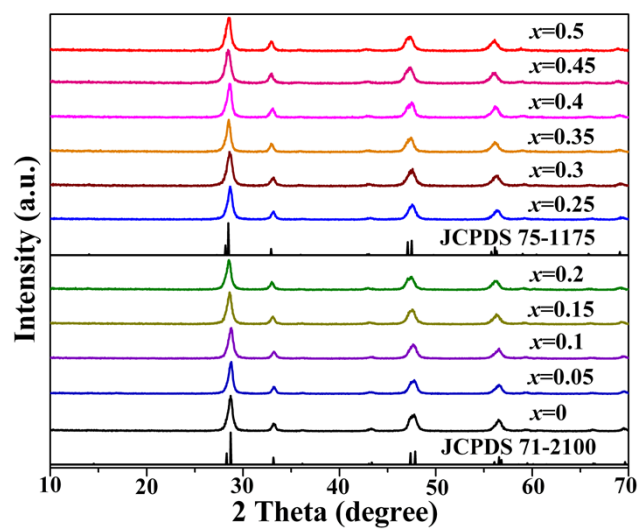

Fig. S2 XRD patterns of  $Y_{0.9-x}Gd_xOF:0.1Eu$  ( $x = 0, 0.05, 0.1, 0.15, 0.2, 0.25, 0.3, 0.35, 0.4, 0.45,$  and  $0.5$ ) samples.

**Table S1** The refined lattice parameters of  $Y_{0.9-x}Gd_xOF$  with different  $Gd^{3+}$  concentration

| Samples                     | $a/\text{\AA}$ | $b/\text{\AA}$ | $c/\text{\AA}$ | Cell volume/ $\text{\AA}^3$ |
|-----------------------------|----------------|----------------|----------------|-----------------------------|
| YOF:0.1Eu                   | 3.8118         | 3.8118         | 18.7302        | 235.68                      |
| $Y_{0.85}Gd_{0.05}OF:0.1Eu$ | 3.8127         | 3.8127         | 18.7427        | 236.07                      |
| $Y_{0.80}Gd_{0.10}OF:0.1Eu$ | 3.8170         | 3.8170         | 18.7528        | 236.62                      |
| $Y_{0.75}Gd_{0.15}OF:0.1Eu$ | 3.8179         | 3.8179         | 18.7988        | 237.02                      |
| $Y_{0.70}Gd_{0.20}OF:0.1Eu$ | 3.8205         | 3.8205         | 18.8569        | 238.36                      |
| $Y_{0.65}Gd_{0.25}OF:0.1Eu$ | 6.6644         | 6.6644         | 6.6644         | 79.73                       |
| $Y_{0.60}Gd_{0.30}OF:0.1Eu$ | 6.6680         | 6.6680         | 6.6680         | 80.08                       |
| $Y_{0.55}Gd_{0.35}OF:0.1Eu$ | 6.6935         | 6.6935         | 6.6935         | 80.10                       |
| $Y_{0.50}Gd_{0.40}OF:0.1Eu$ | 6.7038         | 6.7038         | 6.7038         | 80.18                       |
| $Y_{0.45}Gd_{0.45}OF:0.1Eu$ | 6.7214         | 6.7214         | 6.7214         | 80.76                       |
| $Y_{0.40}Gd_{0.50}OF:0.1Eu$ | 6.7378         | 6.7378         | 6.7378         | 80.78                       |

**Table S2** The CIE chromaticity coordinates of Gd<sup>3+</sup> doped YOF:0.1Eu samples

| Gd <sup>3+</sup> amount | CIE (x,y)      | CCT(K) |
|-------------------------|----------------|--------|
| 0                       | (0.649, 0.350) | 2546   |
| 0.05                    | (0.651, 0.347) | 2652   |
| 0.1                     | (0.656, 0.343) | 2844   |
| 0.15                    | (0.652, 0.348) | 2639   |
| 0.2                     | (0.653, 0.346) | 2709   |
| 0.25                    | (0.651, 0.348) | 2625   |
| 0.3                     | (0.655, 0.348) | 2681   |
| 0.35                    | (0.655, 0.344) | 2798   |
| 0.4                     | (0.655, 0.345) | 2768   |
| 0.45                    | (0.654, 0.345) | 2753   |
| 0.5                     | (0.657, 0.345) | 2797   |
